# Supplementary material for: Correlating the effective work function at buried organic/metal interfaces with organic solar cell characteristics
Source: Royal Society of Chemistry journal article supplement (doi:10.1039/c8tc02381f), 2018-01-01
Supplement: c8tc02381f1.pdf [file c8tc02381f1.pdf]

## Correlating the effective work function at buried organic/metal interfaces with organic solar cell characteristics

Basel Shamieh<sup>a</sup>, Ana S. Anselmo<sup>b,c</sup>, Uwe Vogel<sup>b,c</sup>, Eirini Lariou<sup>d</sup>, Sophia C. Hayes<sup>d</sup>, Norbert Koch<sup>b,c</sup>, and Gitti L. Frey<sup>\*a</sup>

<sup>a</sup> Department of Materials Science and Engineering, Technion – Israel Institute of Technology, Haifa, Israel

<sup>b</sup> Humboldt-Universität zu Berlin, Institut für Physik & IRIS Adlershof, Newtonstrasse 15, 12489 Berlin, Germany

<sup>c</sup> Helmholtz-Zentrum Berlin für Materialien und Energie, Albert-Einstein-Strasse 15, 12489 Berlin, Germany

<sup>d</sup> Department of Chemistry, University of Cyprus, P.O. Box 20357, 1678, Nicosia, Cyprus

\*corresponding author: gitti@technion.ac.il

### Supplementary Information

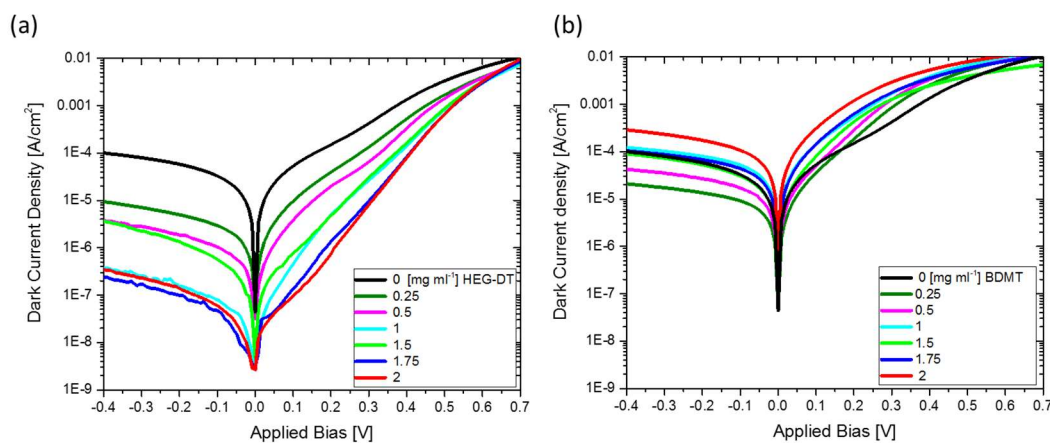

Figure S1: Average J-V curves in dark of P3HT:PCBM OSC devices with different concentration of (a) HEG-DT; and (b) BDMT.

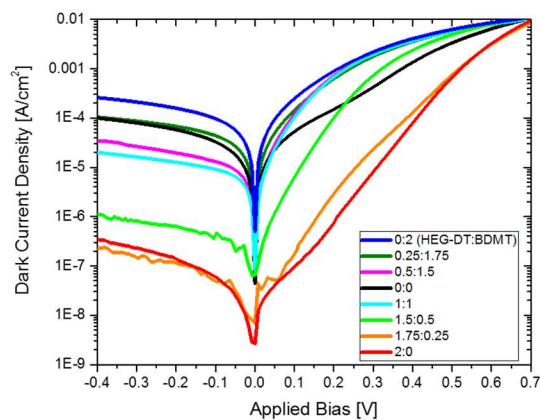

Figure S2: Average J-V curves in dark of P3HT:PCBM (20:20 mg ml<sup>-1</sup>) OSC devices with mixtures of HEG-DT:BDMT additives. The inset lists the composition of additive mixture in [mg ml<sup>-1</sup>] so that the overall concentration of additives is 2 mg ml<sup>-1</sup>.

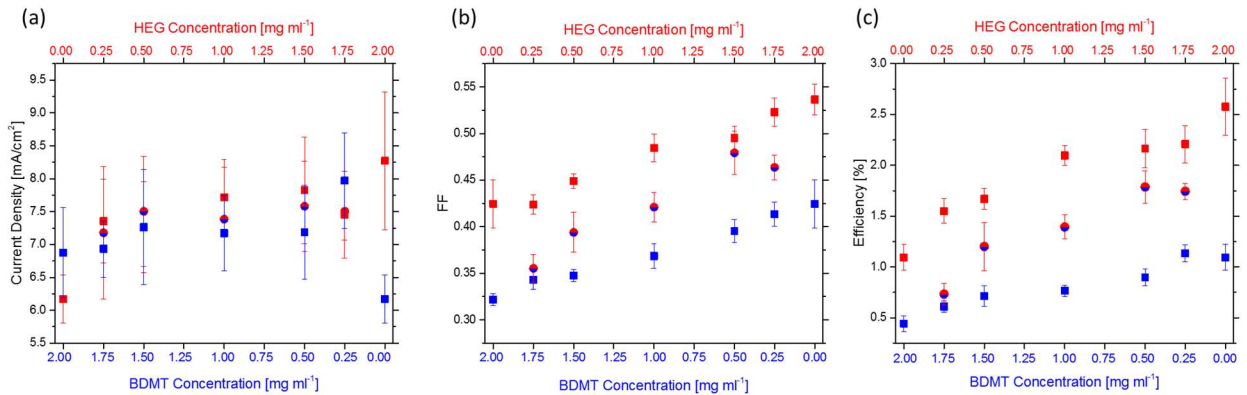

Figure S3: (a) Current density, (b) Fill Factor and (c) Efficiency of the devices as a function of type and concentration of additives and additive mixtures. The red symbols and top x-axis correspond to HEG-DT, while the blue symbols and bottom x-axis correspond to BDMT. The joint red/blue symbols represent  $V_{oc}$  values of devices prepared with additive mixtures.

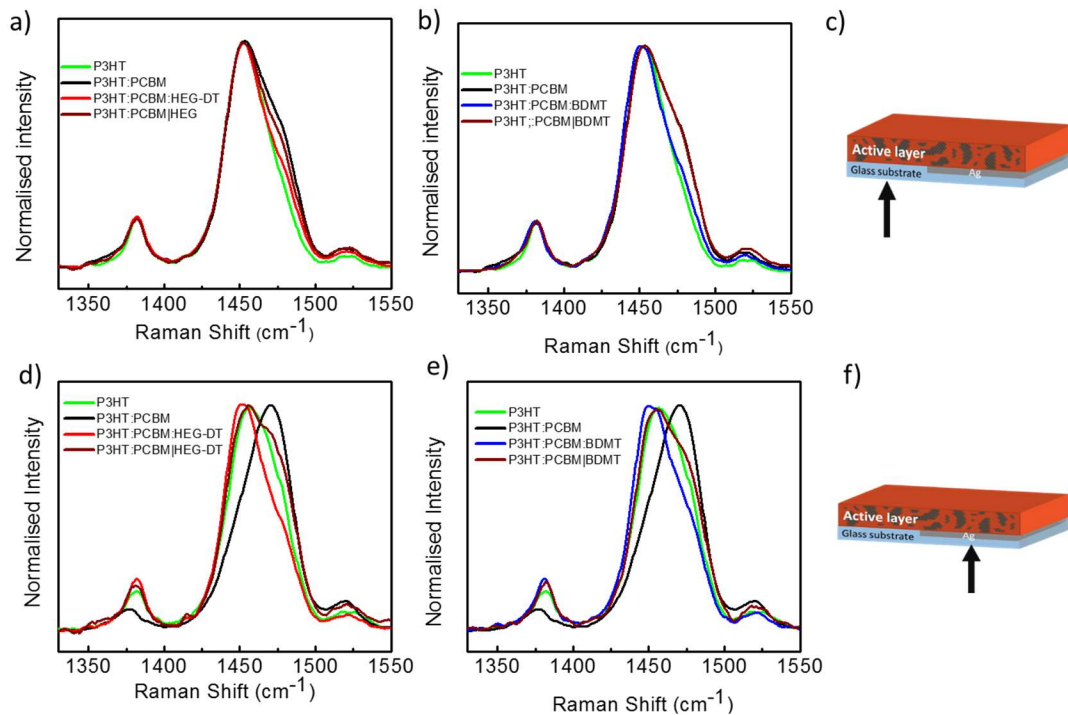

Figure S4: Resonance Raman (a and b) and surface enhanced resonance Raman spectra (d and e) of P3HT at the glass/organic and Silver/organic interface respectively. Both measurement conditions are illustrated in schematics (c) and (d). The films measured are: neat P3HT (green), P3HT:PCBM (black), P3HT:PCBM mixed with 5 [mg ml<sup>-1</sup>] HEG-DT (red) or BDMT (blue) and P3HT:PCBM layer deposited on top of either a HEG-DT or a BDMT layer (dark red).
